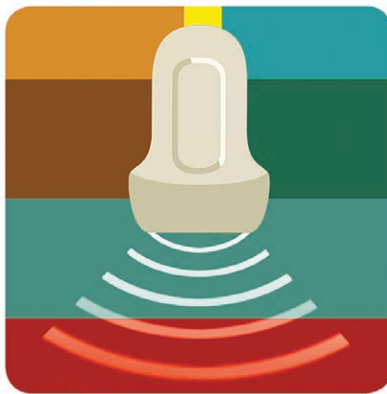

## Call for Papers

### Point of Care Ultrasound in Perioperative, Critical Care, and Pain Medicine

ANESTHESIOLOGY 2018 Journal Symposium  
American Society of Anesthesiologists Annual Meeting 2018  
Sunday, October 14, 2018, San Francisco, California

A stroll through the operating rooms, intensive care units, or clinics of a modern health system demonstrates that we are in the midst of a revolution in the use of point of care ultrasound (point-of-care ultrasound). Just a decade or two ago, large unwieldy point-of-care ultrasound machines were relegated to high-acuity operating rooms. Now, point-of-care ultrasound is used to guide diagnosis, treatment, and management of patients across the perioperative, critical care, and pain medicine spectrum. As devices have shrunk from large carts to handheld smartphones, they have permeated all phases of care and levels of training; first-year residents comfortably use ultrasound for routine vascular cannulation and it has replaced invasive hemodynamic monitoring in many high-risk procedures. However, many questions remain regarding the use of point-of-care ultrasound by the anesthesiologist: what diagnostic and management dilemmas could be informed or eliminated by the use of point-of-care ultrasound? Where does convincing, reliable evidence demonstrate the underutilization of point-of-care ultrasound as a standard of care? How much of current point-of-care ultrasound use is evidence based, *versus* technology fad? How has point-of-care ultrasound changed clinical outcomes? What can the history of point-of-care ultrasound teach us about its future applications? What are the next novel frontiers for the use of point-of-care ultrasound by anesthesiologists? The 2018 Journal Symposium seeks to showcase current concepts and current research in the field. Three experts will introduce these topics for the first 90 min of the symposium, with 20-min presentations and 10-min discussions.

We invite abstracts on this topic from all related fields: basic science, translational, clinical, quality improvement, and education research. The top eight abstracts will be presented orally during the second half of the symposium. The authors of abstracts selected for the symposium will be offered an opportunity to submit their full manuscripts to ANESTHESIOLOGY for inclusion in an issue to be published in the spring of 2019.

Article submission deadline is August 1, 2018. Journal submission guidelines can be found at <http://anesthesiology.pubs.asahq.org/public/InstructionsforAuthors.aspx>.
